# Supplementary material
Source: PubMed Central journal article supplement (PMC2739889)
Supplement: NIHMS137251-supplement-1_si_001.pdf [file NIHMS137251-supplement-1_si_001.pdf]

Supporting information for:

Resonance Raman spectra of an O<sub>2</sub>-binding H-NOX domain reveal  
heme relaxation upon mutation

Rosalie Tran<sup>‡</sup>, Elizabeth M. Boon<sup>‡,⊥</sup>, Michael A. Marletta<sup>‡,§\*</sup>, and Richard A. Mathies<sup>‡\*</sup>

Departments of Chemistry and Molecular and Cell Biology,

University of California, Berkeley, CA 94720

\* To whom correspondence should be addressed.

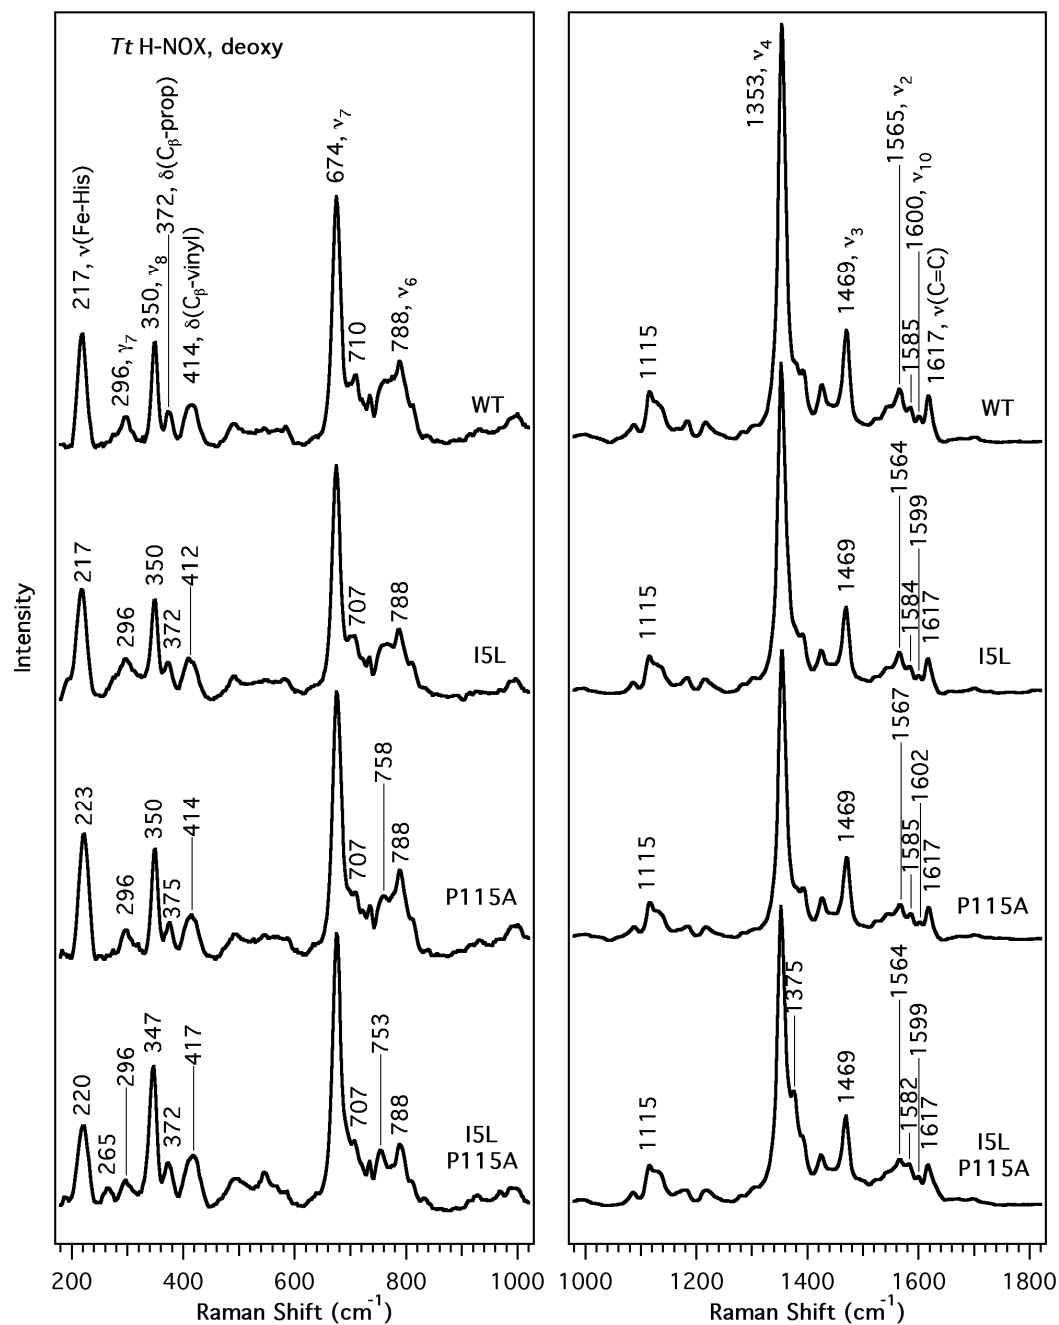

**Figure 1S:** Resonance Raman spectra of the Fe<sup>II</sup>-unligated form of *Tt* H-NOX WT, I5L, P115A, and I5L/P115A. Spectral intensities in the low and high frequency regions were normalized to  $\nu_7$  and  $\nu_4$ , respectively.

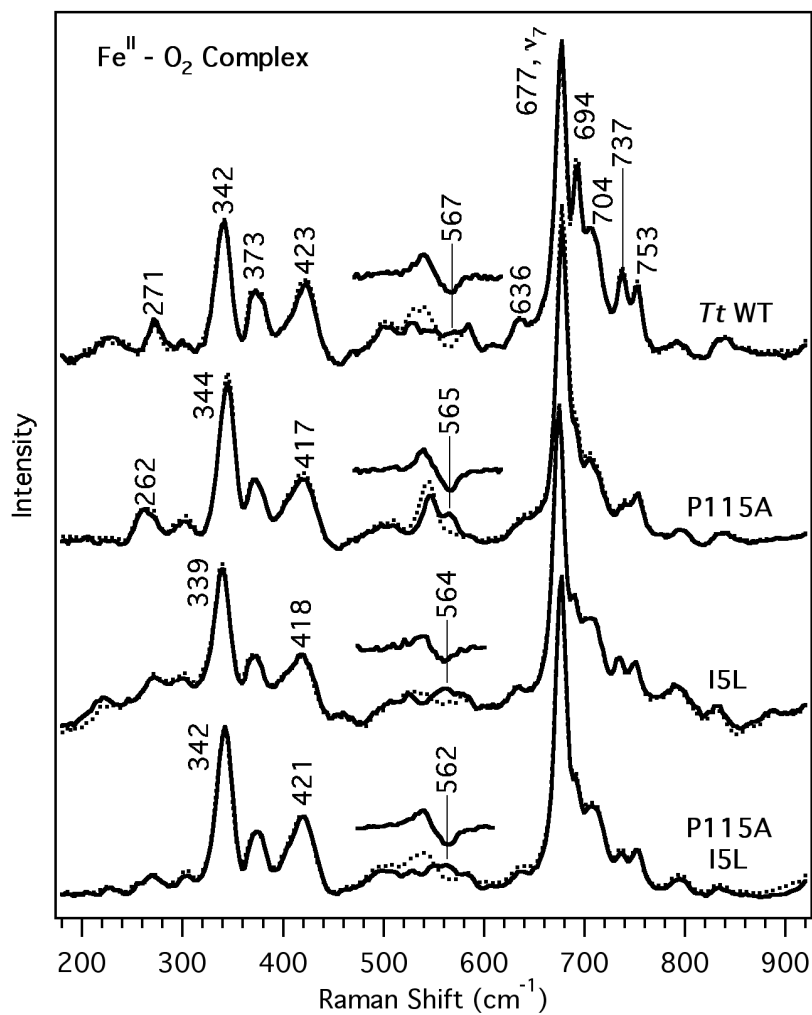

**Figure 2S:** Resonance Raman spectra of the O<sub>2</sub> complexes of *Tt* H-NOX WT, I5L, P115A, and I5L/P115A in the low frequency region. <sup>18</sup>O<sub>2</sub> spectra (dotted line) are overlapped over the <sup>16</sup>O<sub>2</sub> spectra to indicate the frequency shifts upon isotopic substitution, and the difference (<sup>18</sup>O<sub>2</sub>-<sup>16</sup>O<sub>2</sub>) spectra are shown above each protein for clarity in the ν(Fe-O<sub>2</sub>) assignment. Spectral intensities were normalized to ν<sub>7</sub>.

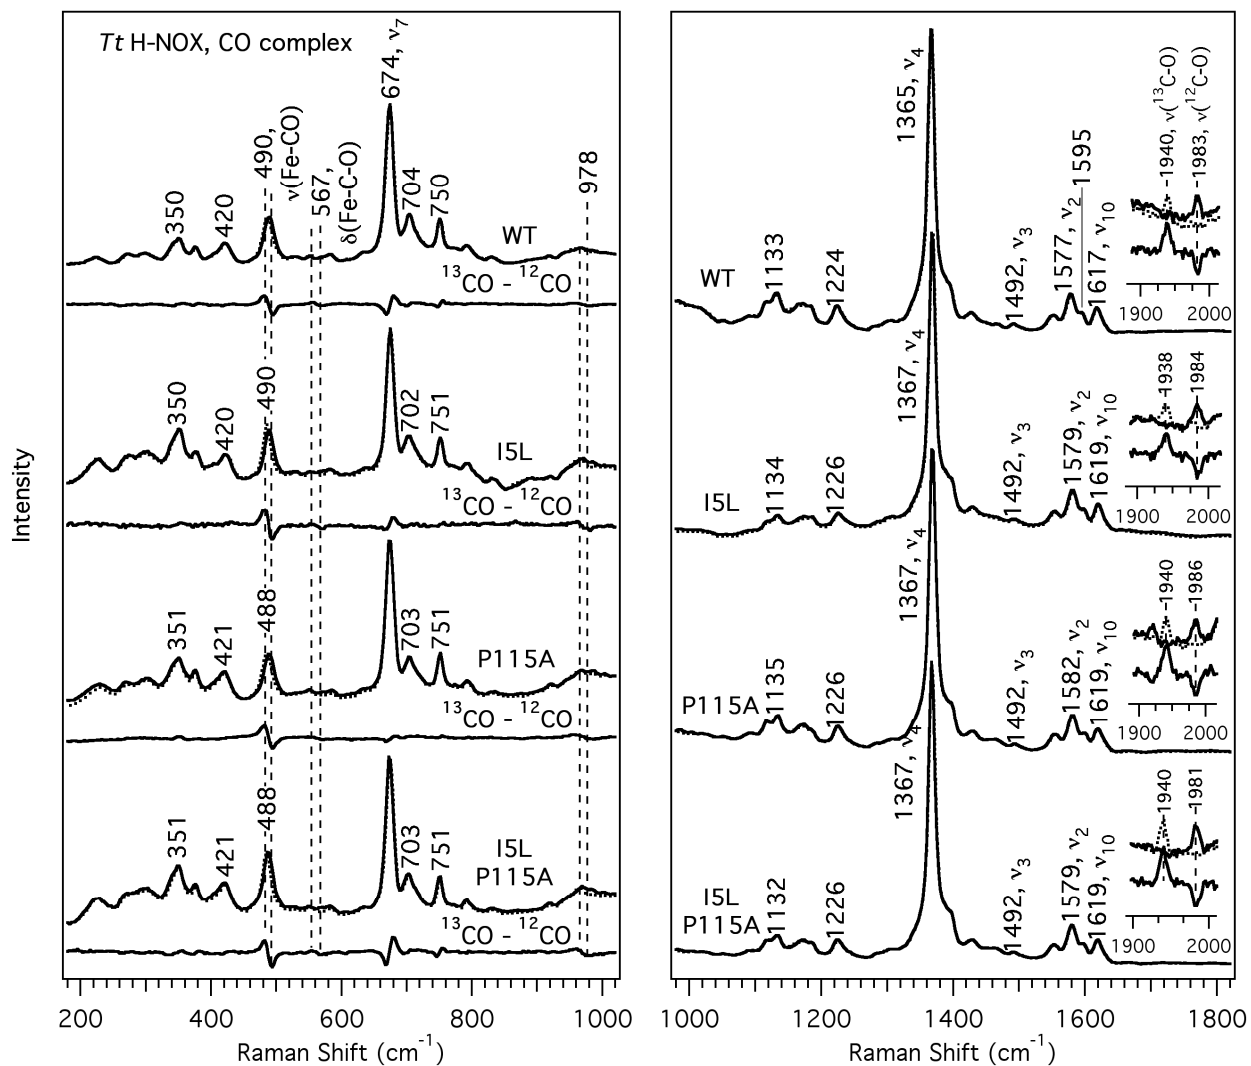

**Figure 3S:** Resonance Raman spectra of the CO complexes of *Tt* H-NOX WT, I5L, P115A, and I5L/P115A.  $^{13}\text{CO}$  spectra (dotted line) are overlapped over the  $^{12}\text{CO}$  spectra to indicate the frequency shifts upon isotopic substitution, and the difference ( $^{13}\text{CO}$ - $^{12}\text{CO}$ ) spectra are shown below each protein for clarity. Spectral intensities were normalized to  $\nu_7$  and  $\nu_4$  for the low and high frequency regions, respectively.

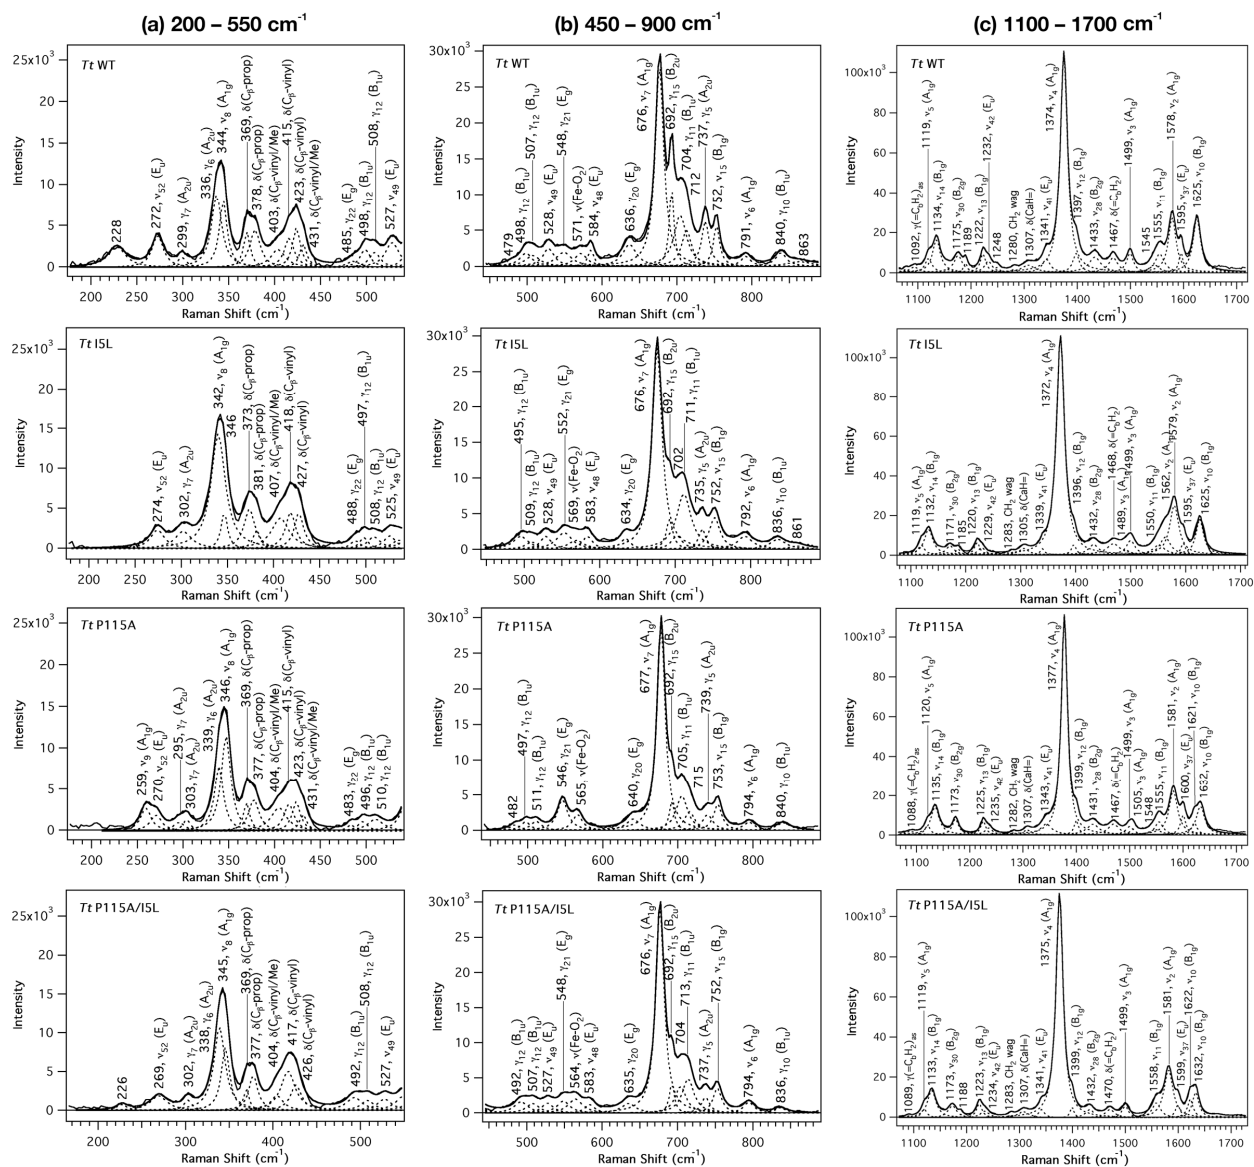

**Figure 4S:** Spectral decomposition of resonance Raman spectra for *Tt* H-NOX WT, I5L, P115A, and I5L/P115A in different frequency regions: (a) 200 – 550 cm<sup>-1</sup>, (b) 450 – 900 cm<sup>-1</sup>, (c) 1100 – 1700 cm<sup>-1</sup>.
